# Supplementary material for: What Competencies Does a Community Occupational Therapist Need in Neurorehabilitation? Qualitative Perspectives
Source: MDPI journal article supplement (doi:10.3390/ijerph19106096), 2022-05-17
Supplement: s1 [file s1]

## **Interview guide**

Greetings, thanks for acceptance, informed consent process (explaining study and interview goals).

Begin interview by asking some personal-professional information. Name, age, time in the profession, current work functions.

### **Dimension: Community-neurorehabilitation links**

- When we think of community occupational therapy, how do you place yourself as an occupational therapist? What do you think about it?
- How would you describe your professional trajectory and your community links?

### **Dimension: Knowledge**

- What theories or models do you habitually use?
- What knowledge should an occupational therapist have when working in neurorehabilitation?
- What theoretical background do you associate with community work?

### **Dimension: Knowledge**

- What procedures do you habitually do?
- What type of evaluations do you use in your practice? How do you do them?
- Can you describe the interventions you typically do?
- How do you link your intervention with community space?
- What community actions do occupational therapists do in your work space?

### **Dimension: Attitudes**

- What values predominate in OT practice in your area?
- What attitudes do you believe to be essential for your neurorehabilitation work?

### **Dimension: Elements to improve**

- What key aspects should be improved to implement occupational therapy in neurorehabilitation?
